# Supplementary material for: Water nanodroplets confined in zeolite pores
Source: Royal Society of Chemistry journal article supplement (doi:10.1039/b804992k), 2008-09-19
Supplement: b804992k.pdf [file b804992k.pdf]

## Electronic Supplementary Information

### Water nanodroplets confined in zeolite pores

F.-X. Coudert, F. Cailliez, R. Vuilleumier, A. H. Fuchs and A. Boutin

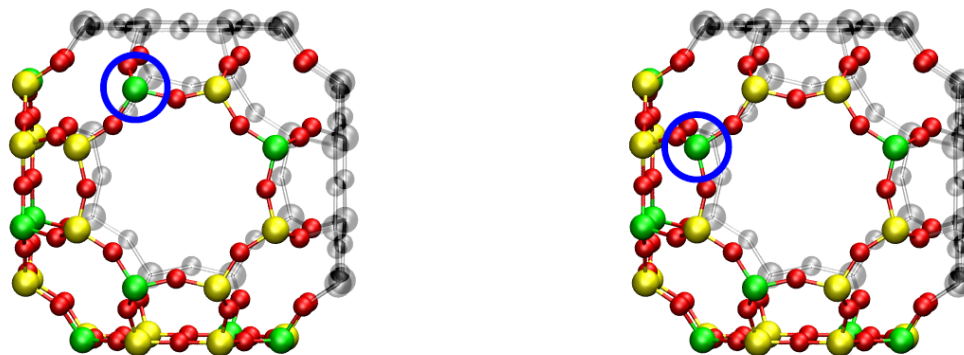

Figure 1S: The two possible structures of  $[\text{Al}_9\text{Si}_{15}\text{O}_{48}]^{-9}$  satisfying Loewenstein's rule. They differ by the position of a single aluminium atom, circled in blue. The atoms of the unit cell are figured in colour and their periodic images, included to form a complete  $\alpha$  cage, are translucent and grey.
